# Supplementary material for: Multiple factors maintain assembled trans-SNARE complexes in the presence of NSF and αSNAP
Source: eLife journal article supplement (doi:10.7554/elife.38880), 2019-01-18
Supplement: supp [file elife-38880-supp-v1.zip]

Archive with 14 entries (14 files):
- elife_poa_e38880_Figure_3_figure_supplement_1.pdf
- elife_poa_e38880_Figure_5_figure_supplement_2.pdf
- elife_poa_e38880_Figure_3_figure_supplement_2.pdf
- elife_poa_e38880_Figure_2_figure_supplement_4.pdf
- elife_poa_e38880_Figure_5_figure_Supplement_4.pdf
- elife_poa_e38880_Figure_5_figure_supplement_3.pdf
- elife_poa_e38880_Figure_4_figure_supplement_1.pdf
- elife_poa_e38880_Figure_5_figure_supplement_1.pdf
- elife_poa_e38880_Figure_6_figure_supplement_1.pdf
- elife_poa_e38880_Transparent_Reporting_File.pdf
- elife_poa_e38880_Figure_2_figure_supplement_1.pdf
- elife_poa_e38880_Figure_5_figure_suppleent_5.pdf
- elife_poa_e38880_Figure_2_figure_supplement_2.pdf
- elife_poa_e38880_Figure_2_figure_supplement_3.pdf
