# Supplementary figures and images for: Multiple factors maintain assembled trans-SNARE complexes in the presence of NSF and αSNAP
Source: eLife journal article supplement (doi:10.7554/elife.38880), 2019-01-18

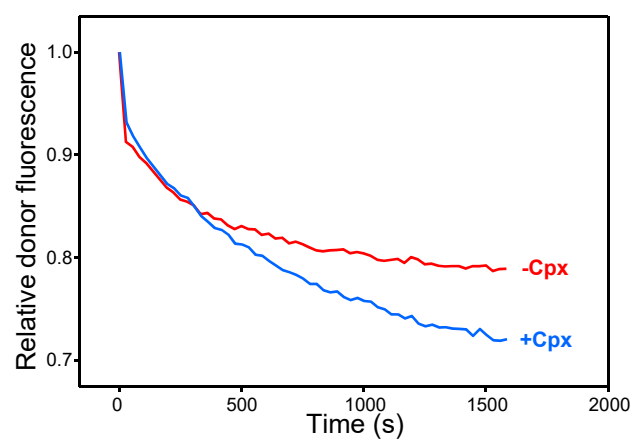

**Figure 3 – figure supplement 1**  
**Prinslow et al.**

Supplement: supp [file elife-38880-supp-v1.zip › elife_poa_e38880_Figure_3_figure_supplement_1.pdf]

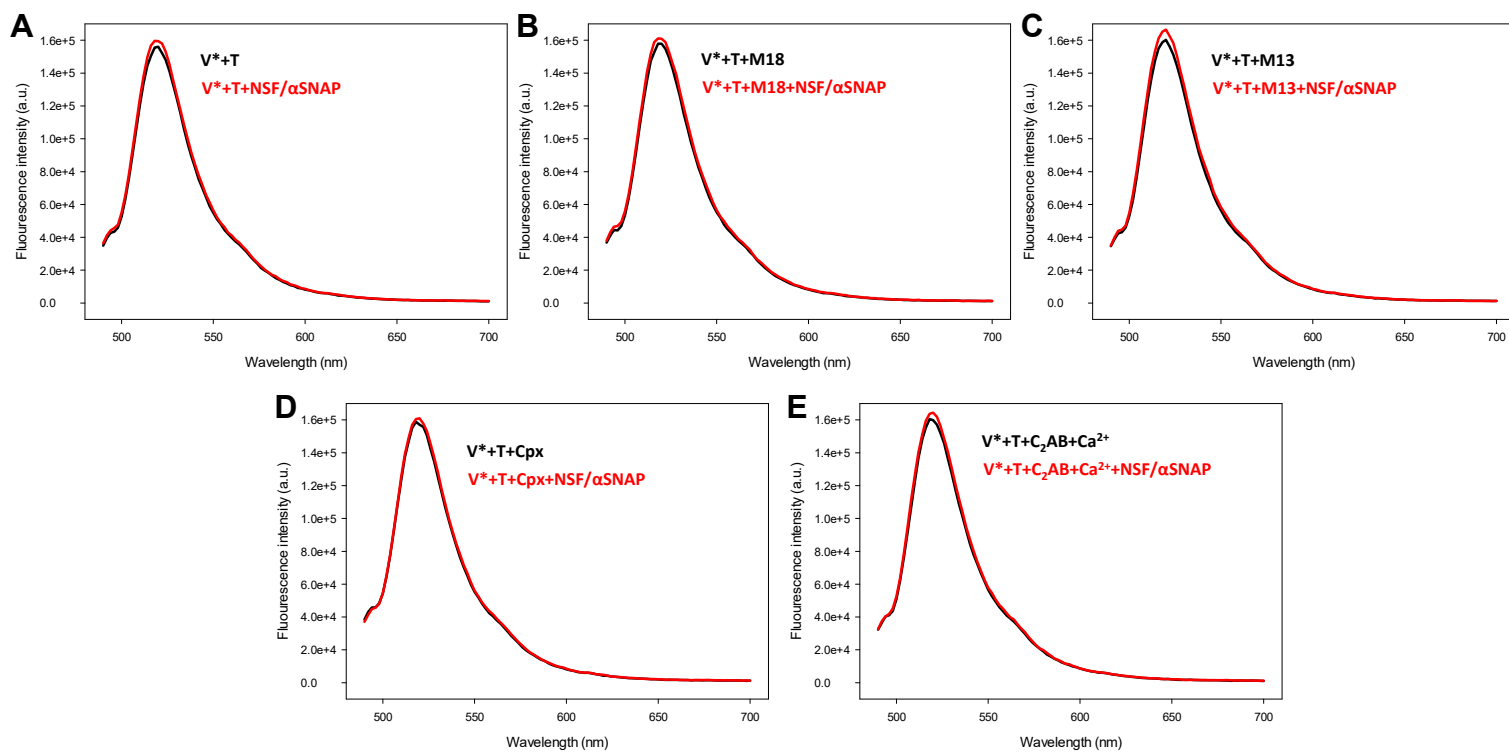

**Figure 5 – figure supplement 2**  
**Prinslow et al.**

Supplement: supp [file elife-38880-supp-v1.zip › elife_poa_e38880_Figure_5_figure_supplement_2.pdf]

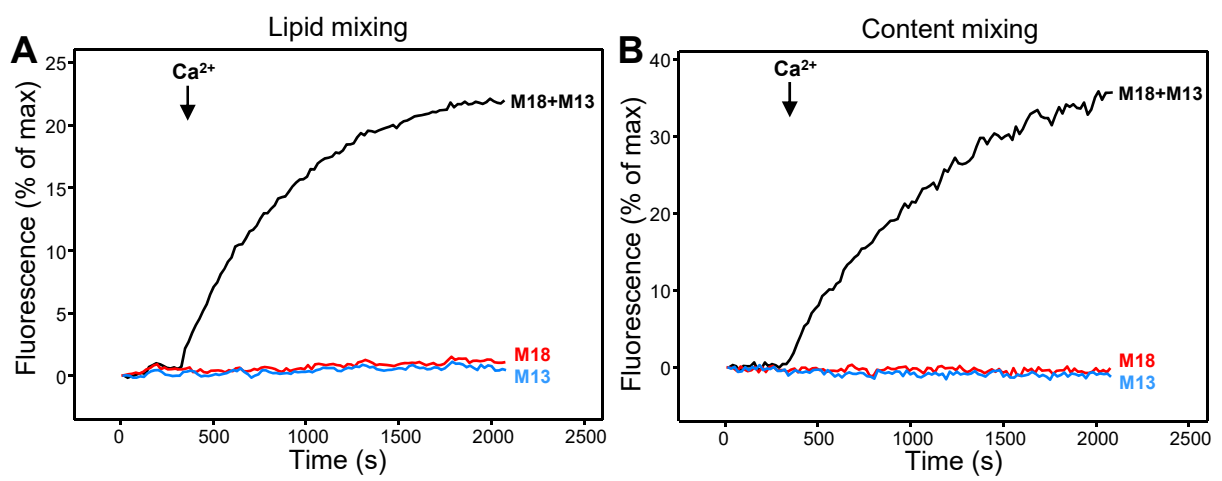

**Figure 3 – figure supplement 2**  
**Prinslow et al.**

Supplement: supp [file elife-38880-supp-v1.zip › elife_poa_e38880_Figure_3_figure_supplement_2.pdf]

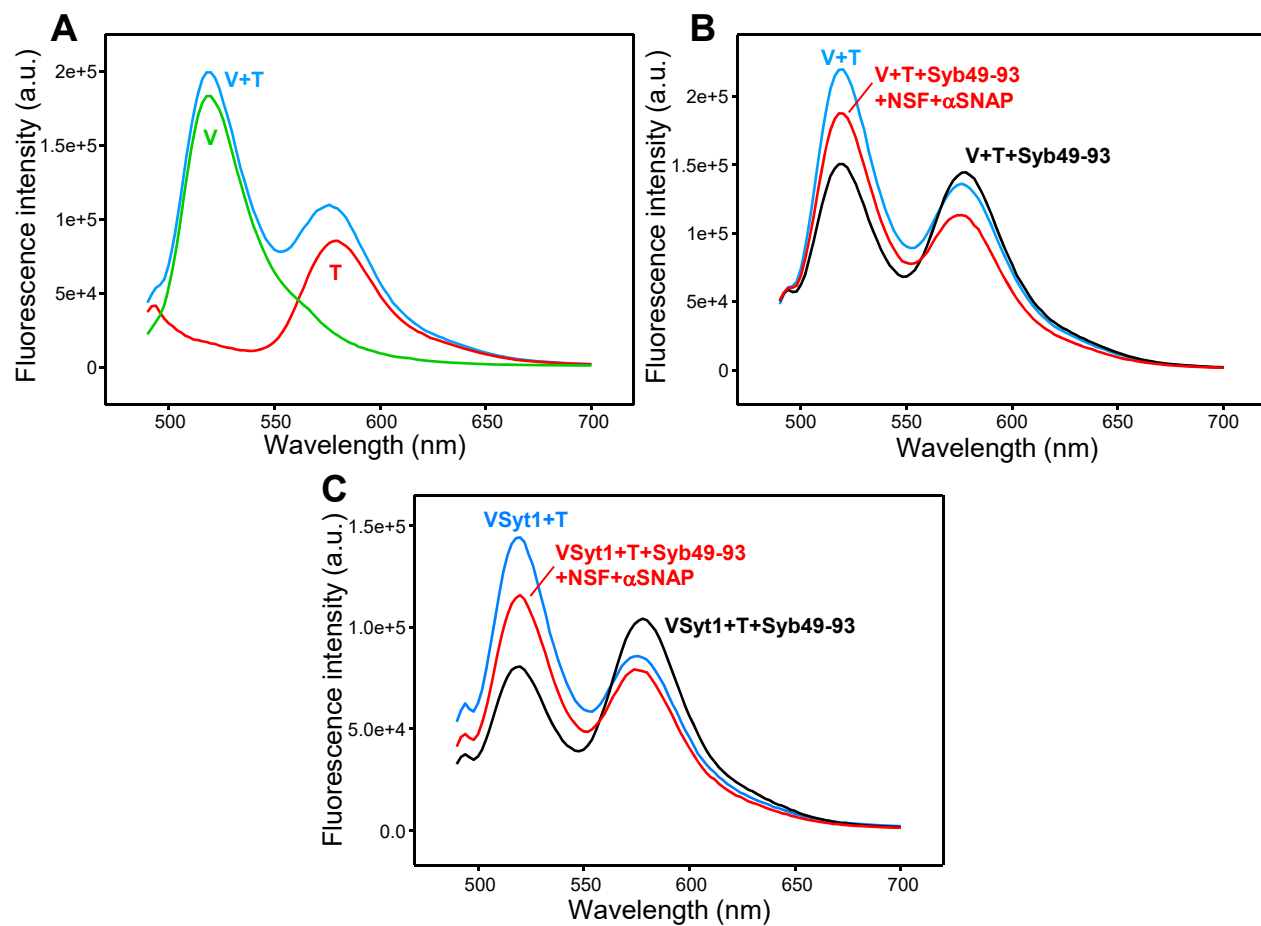

**Figure 2 – figure supplement 4**  
**Prinslow et al.**

Supplement: supp [file elife-38880-supp-v1.zip › elife_poa_e38880_Figure_2_figure_supplement_4.pdf]

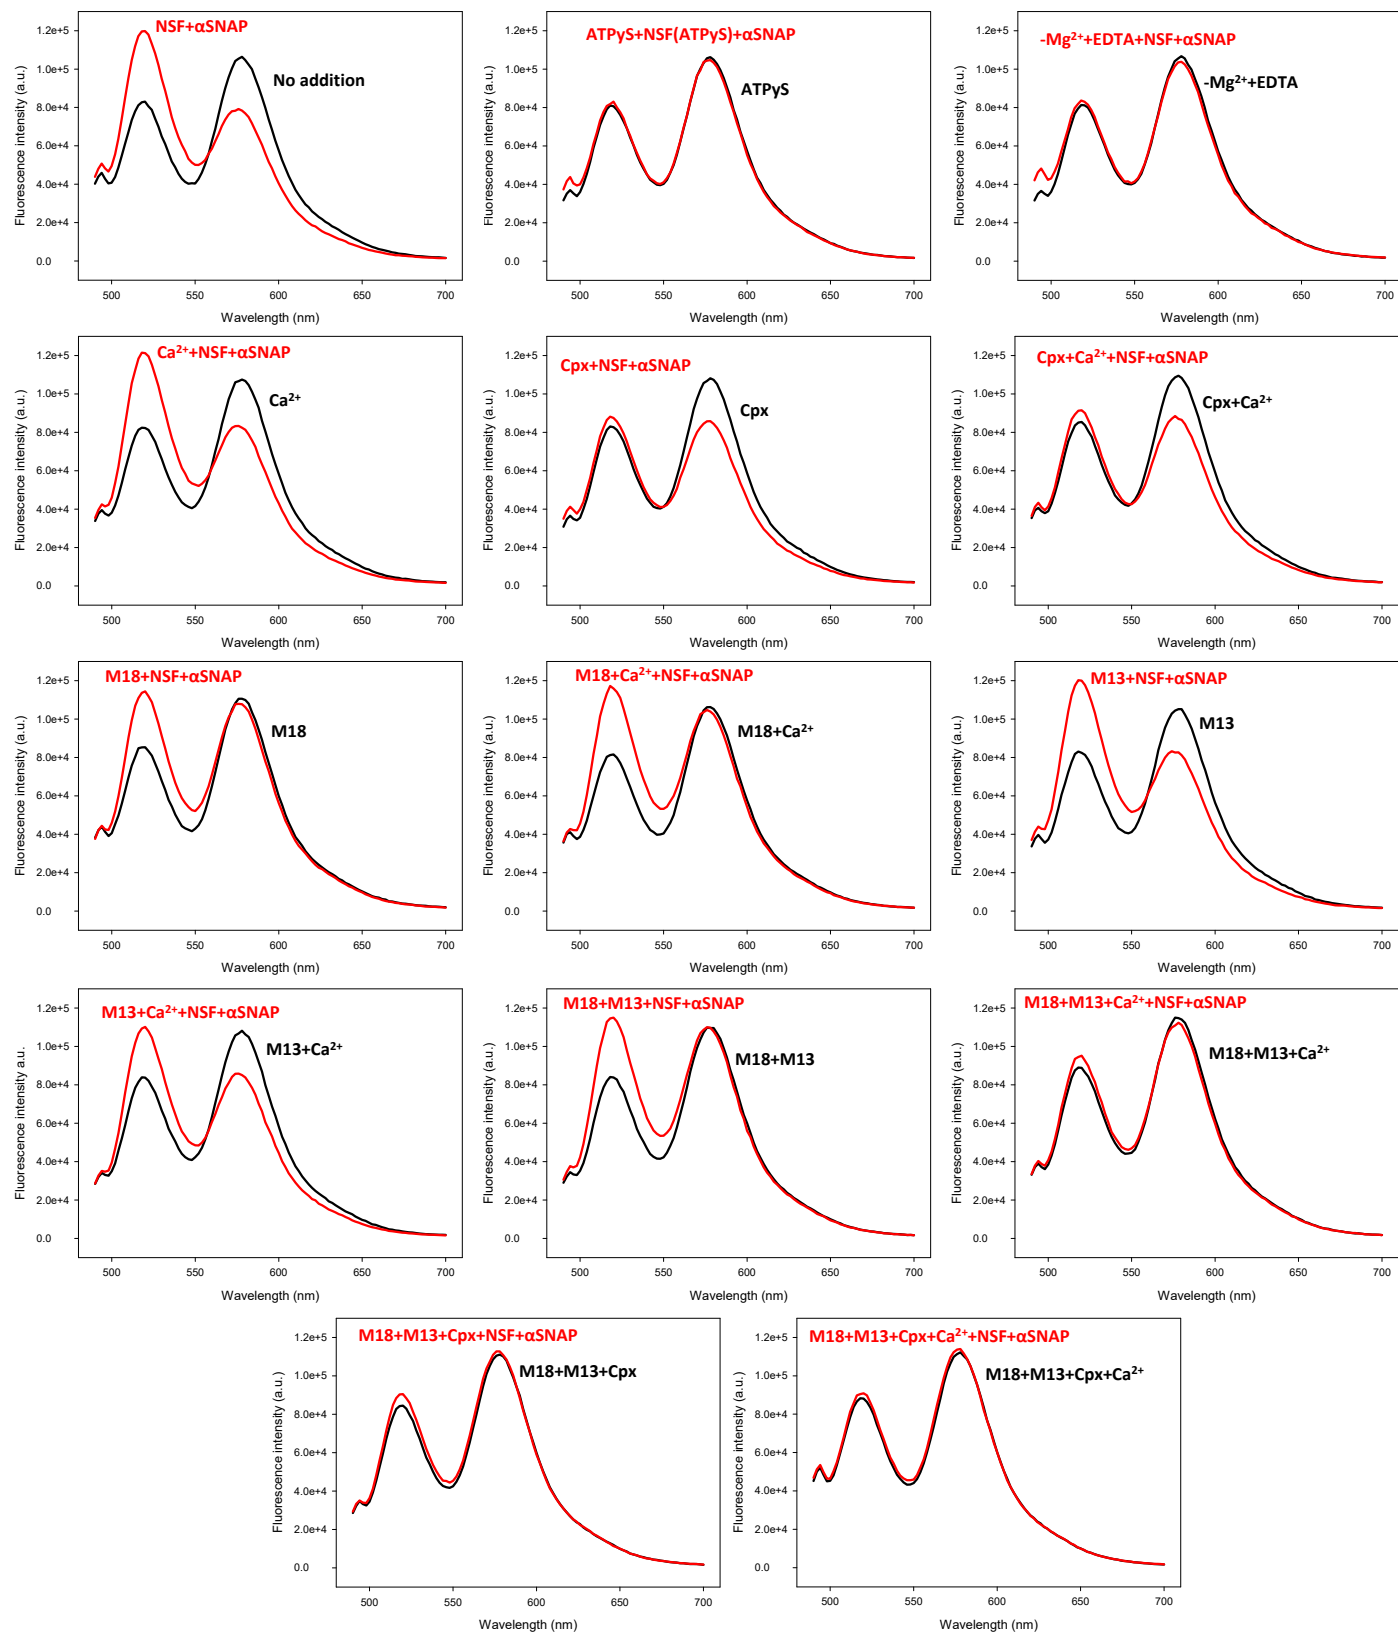

**Figure 5 – figure supplement 4**  
**Prinslow et al.**

Supplement: supp [file elife-38880-supp-v1.zip › elife_poa_e38880_Figure_5_figure_Supplement_4.pdf]

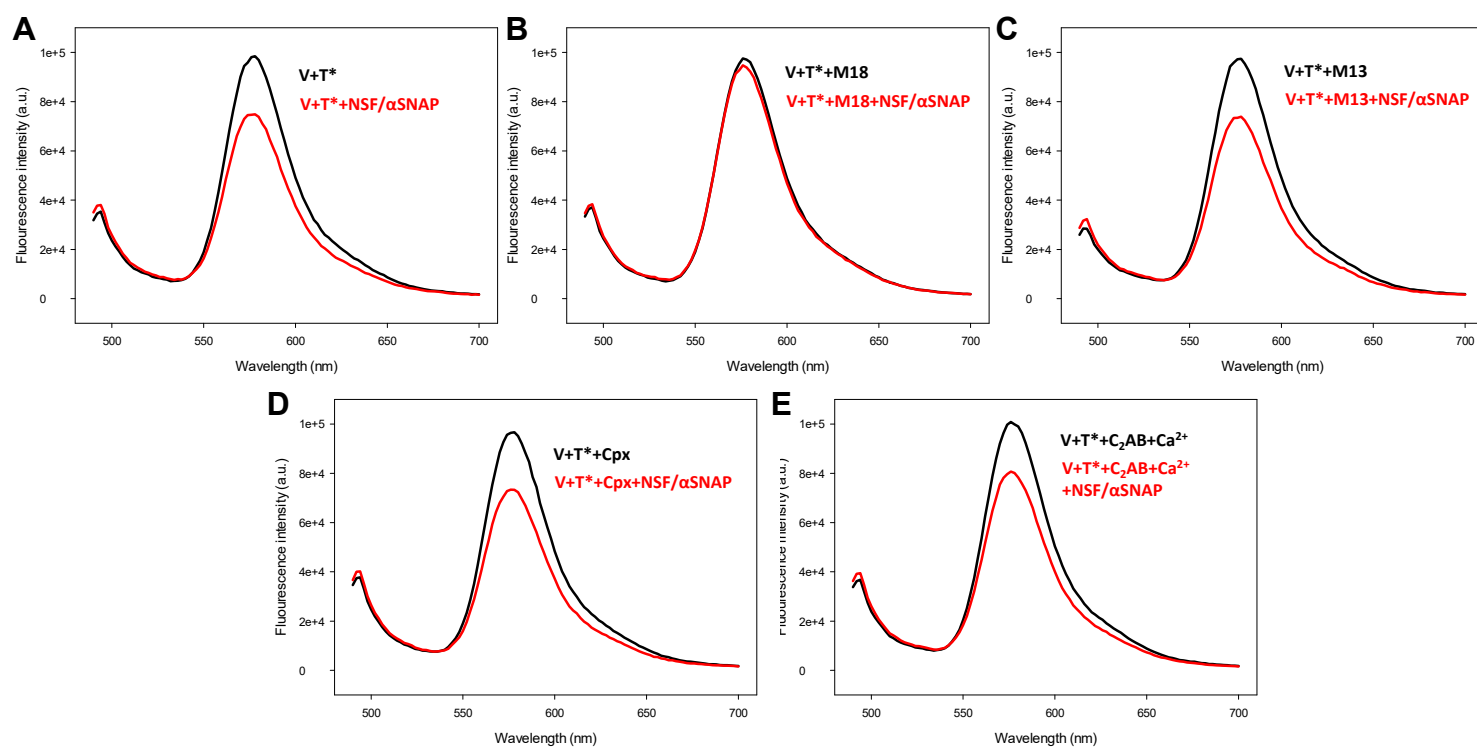

**Figure 5 – figure supplement 3**  
**Prinslow et al.**

Supplement: supp [file elife-38880-supp-v1.zip › elife_poa_e38880_Figure_5_figure_supplement_3.pdf]

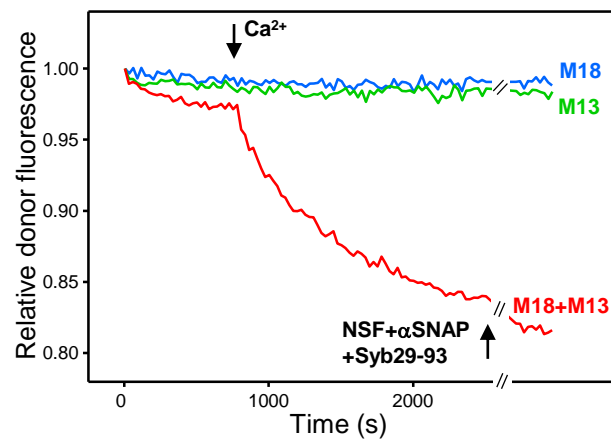

**Figure 4-Figure supplement 1**  
**Prinslow et al.**

Supplement: supp [file elife-38880-supp-v1.zip › elife_poa_e38880_Figure_4_figure_supplement_1.pdf]

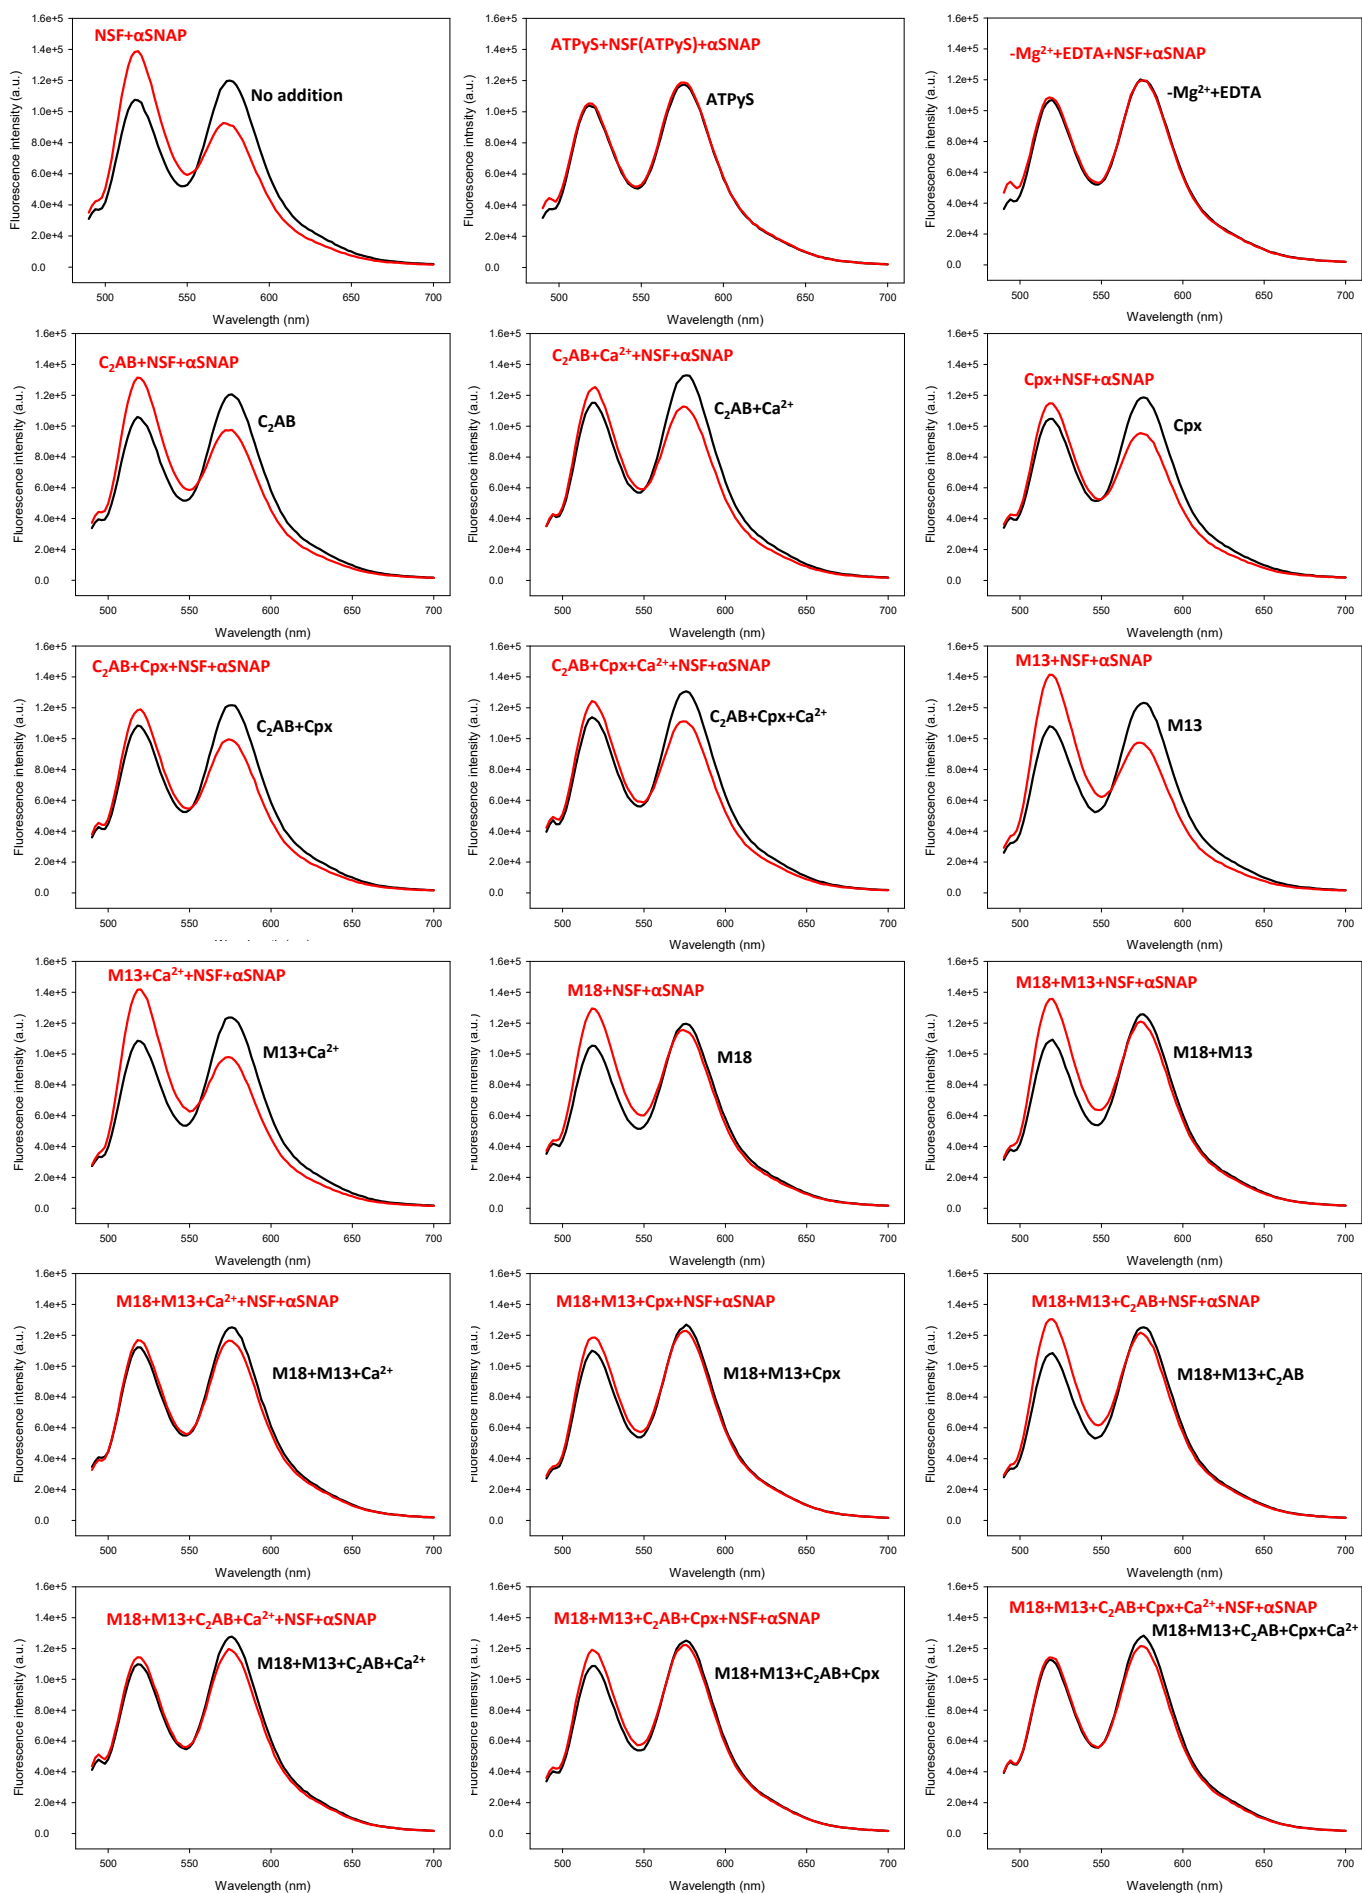

**Figure 5 – figure supplement 1**  
**Prinslow et al.**

Supplement: supp [file elife-38880-supp-v1.zip › elife_poa_e38880_Figure_5_figure_supplement_1.pdf]

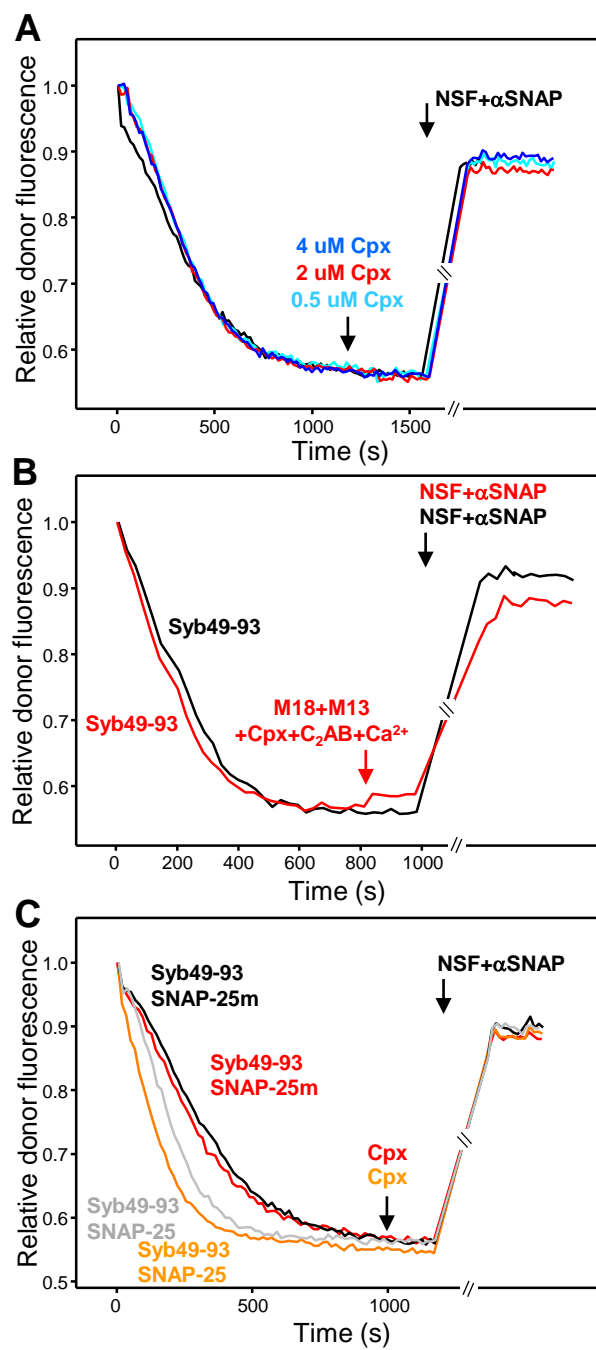

**Figure 6 –Figure Supplement 1**  
Prinslow et al.

Supplement: supp [file elife-38880-supp-v1.zip › elife_poa_e38880_Figure_6_figure_supplement_1.pdf]

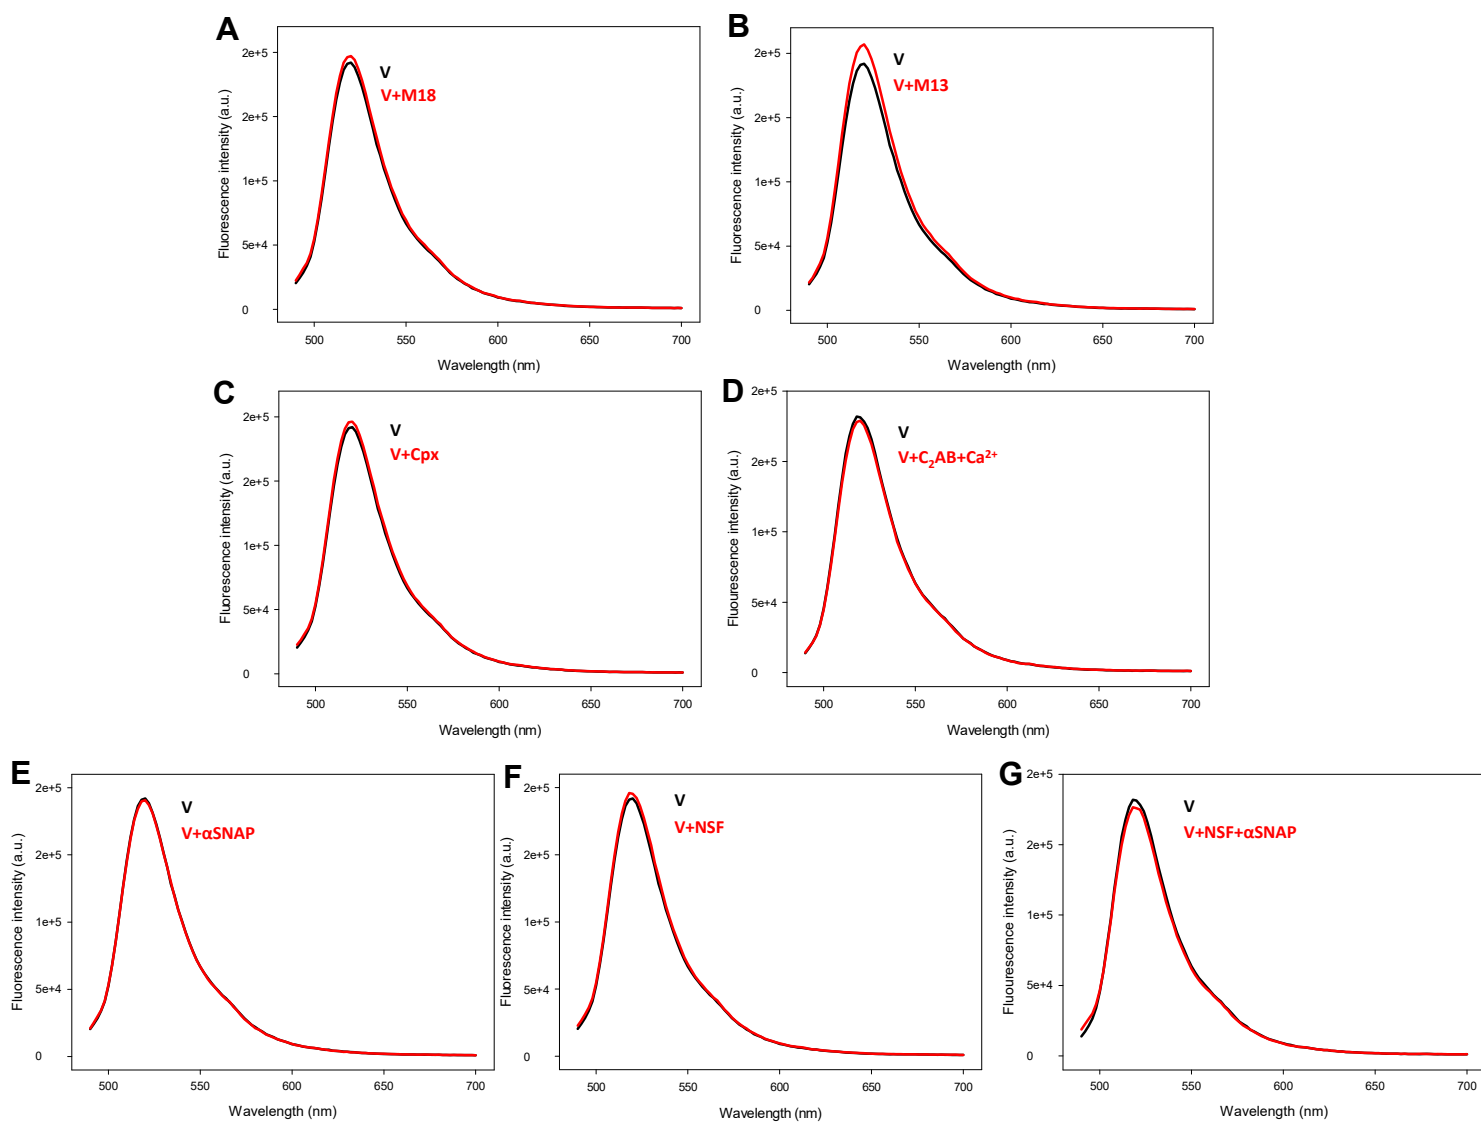

**Figure 2 – figure supplement 1**  
**Prinslow et al.**

Supplement: supp [file elife-38880-supp-v1.zip › elife_poa_e38880_Figure_2_figure_supplement_1.pdf]

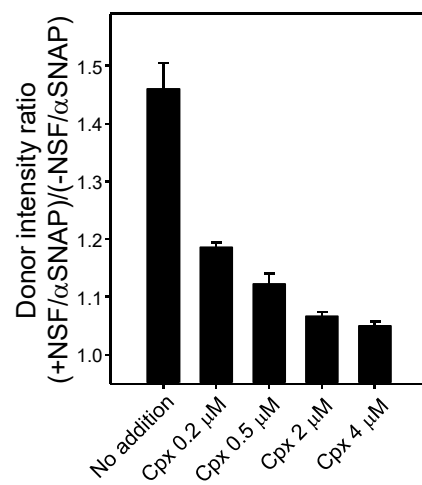

**Figure 5 – figure supplement 5**  
**Prinslow et al.**

Supplement: supp [file elife-38880-supp-v1.zip › elife_poa_e38880_Figure_5_figure_suppleent_5.pdf]

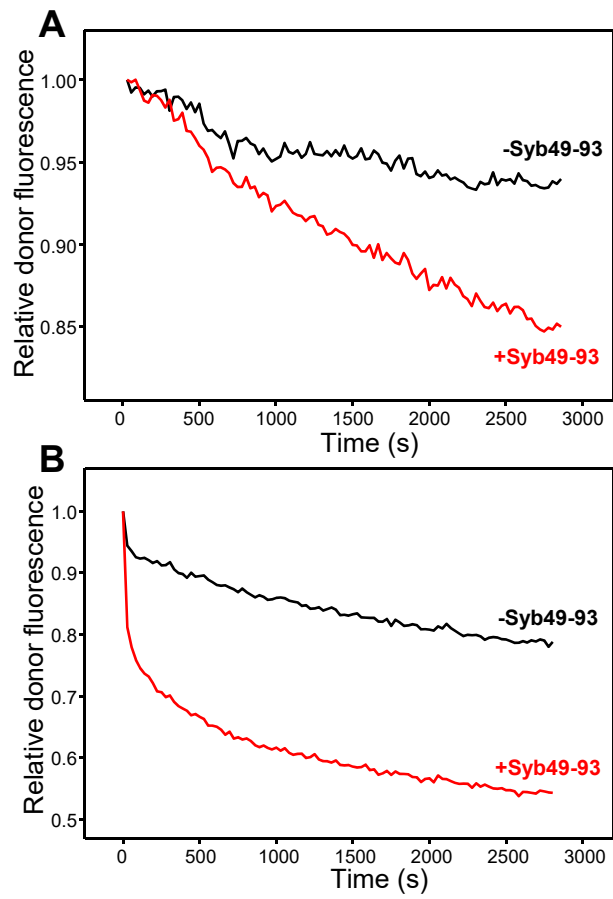

**Figure 2 – figure supplement 2**  
**Prinslow et al.**

Supplement: supp [file elife-38880-supp-v1.zip › elife_poa_e38880_Figure_2_figure_supplement_2.pdf]

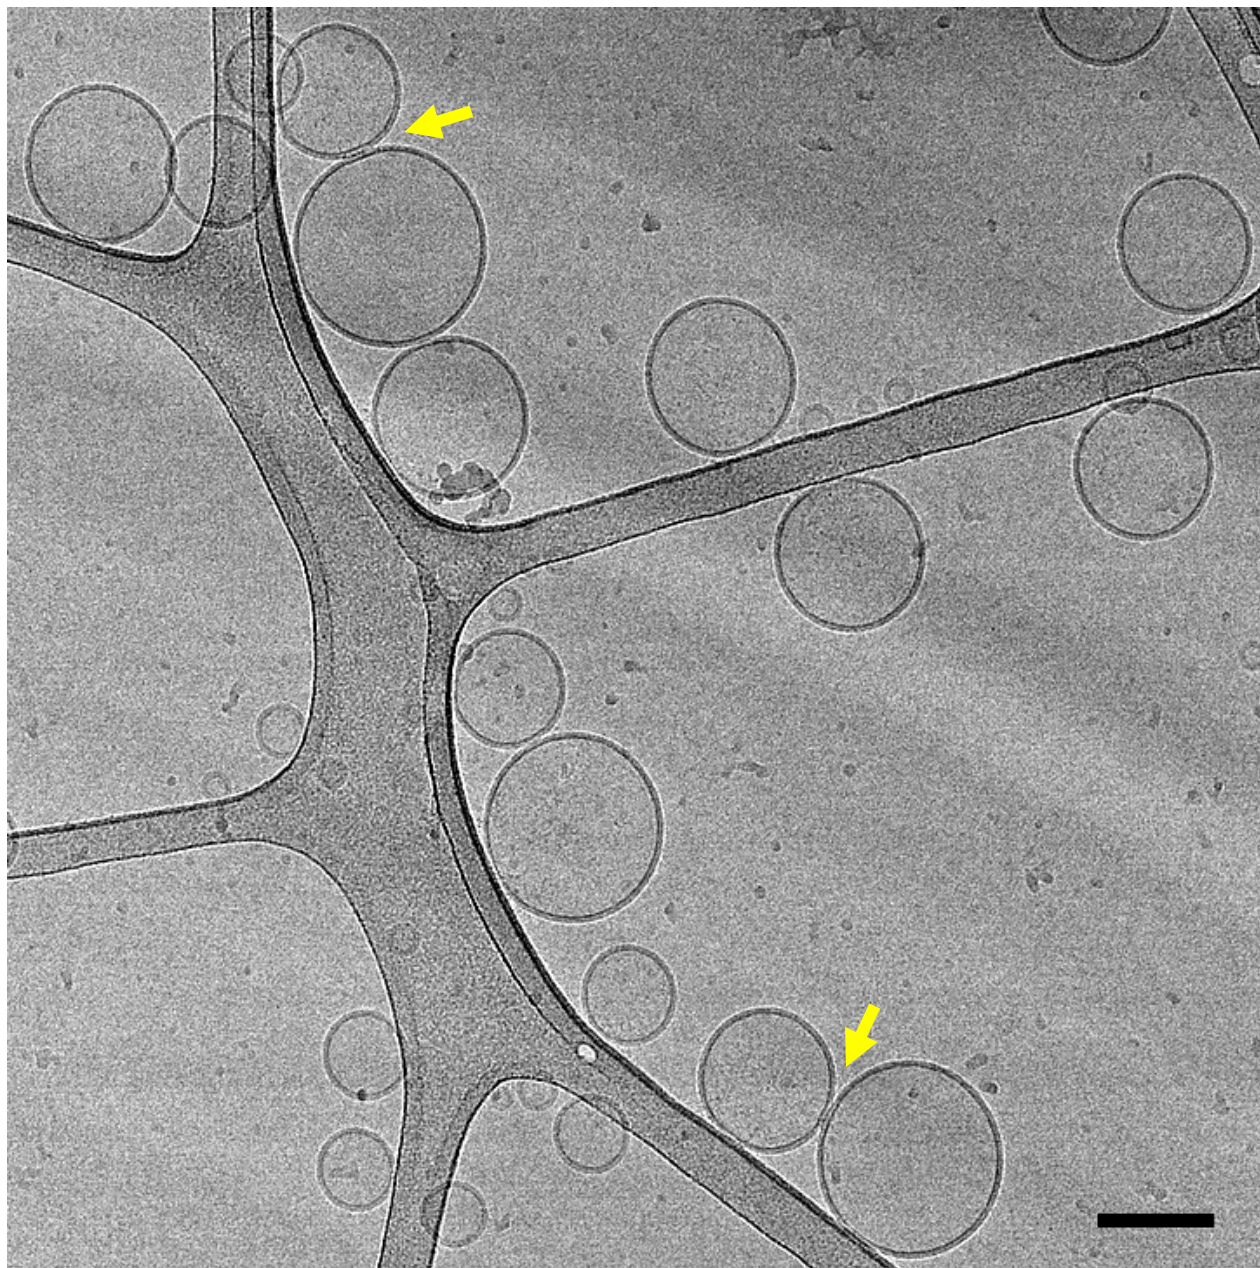

**Figure 2 – figure supplement 3**  
**Prinslow et al.**

Supplement: supp [file elife-38880-supp-v1.zip › elife_poa_e38880_Figure_2_figure_supplement_3.pdf]
